# Supplementary material
Source: publisher figshare collection journal article supplement (https://sage.figshare.com/ndownloader/files/22784216)
Supplement: Supplementary file 1 [file 22784216]

**Marta Estellés** is Assistant Professor of the Department of Education at the University of Cantabria, Spain. Her research interests include citizenship education, social studies education, curriculum policies and teacher education. Dr. Estellés has published several works on the intersectional field of democratic citizenship education and initial teacher education. She is working at present on a research project related to teachers’ political views and behaviors and children’s understandings about controversial issues. Dr. Estellés has been a visiting scholar at Arizona State University and the University of British Columbia. She is also part of the *Fedicaria* collective (<http://www.fedicaria.org>) and co-editor of its journal *Con-Ciencia Social*.

Marta Estellés

Assistant Professor

Department of Education

University of Cantabria

Avda. Los Castros s/n | Santander, 39005

Phone: +34 (696) 265-642.

Email: [marta.estelles@unican.es](mailto:marta.estelles@unican.es)

**Gustavo E. Fischman** is professor of educational policy and comparative education at the Mary Lou Fulton Teachers College, Arizona State University. Dr. Fischman focuses his work on understanding and improving the processes of knowledge-production and exchange between scholars, educators, activists, practitioners, administrators, media workers, policymakers, and the broader public. He is currently leading two research projects. The first project focuses on issues of sustainability education and the uses (and misuses) of global learning metrics and large scale assessments in educational reform projects. The second project explores systems reforms to improve assessment practices in higher education and organizational strategies for mobilizing research knowledge. Dr. Fischman has authored more than 150 academic publications as well as numerous commentaries and interviews. He has been a visiting scholar in several graduate programs in Europe and Latin America. Dr. Fischman has received many awards and appointments, including selected as a *New Century Fulbright scholar* (2010), fellow of the *International Academy of Education,* (2013) and fellow of the *American Educational Research Association* (2015)and appointed to the *W. T. Fulbright Senior Scholar* roster (2017). He is also the chair of the International Relations Committee at AERA and is the ad-honorem coordinator of the program of internationalization of the Pontificia Universidade Católica de Rio de Janeiro (Brazil) and the research program “Community, public knowledge and democracy” of FLACSO (Brazil). In addition to his service on numerous editorial boards, he is the editor of *Education Review*, consulting editor of *Education Policy Analysis Archives*, and a co-editor of the 2018 and 2020 *Review of Research in Education* (AERA). Among his best-known books are *Imagining Teachers: Rethinking Teacher Education and Gender, Dumb Ideas Won't Create Smart Kids* co-authored with Eric M. Haas,and *Made in Latin America: Open Access, Scholarly Journals, and Regional Innovations* co-edited with Juan P. Alperin.

Gustavo E. Fischman

Professor

Mary Lou Fulton Teachers College

Arizona State University

Payne Hall, Suite 204 F | Tempe, AZ 85287-1611

Phone: (480) 965-5225.

Email: [fischman@asu.edu](mailto:fischman@asu.edu)
